# Supplementary material
Source: PubMed Central journal article supplement (PMC6158044)
Supplement: NIHMS964932-supplement-Supp_info.pdf [file NIHMS964932-supplement-Supp_info.pdf]

1 **Supplementary information**

2 **PrgB Promotes Aggregation, Biofilm Formation, and Conjugation through DNA Binding**  
3 **and Compaction**

4  
5 Andreas Schmitt<sup>1</sup>, Kai Jiang<sup>2</sup>, Martha I. Camacho<sup>3</sup>, Venkateswara Rao Jonna<sup>1</sup>, Anders Hofer<sup>1</sup>,  
6 Fredrik Westerlund<sup>2</sup>, Peter J Christie<sup>3</sup> and Ronnie P-A Berntsson<sup>1,\*</sup>

7  
8  
9 <sup>1</sup> Department of Medical Biochemistry and Biophysics, Umeå University, SE-90187 Umeå,  
10 Sweden

11  
12 <sup>2</sup> Department of Biology and Biological Engineering, Chalmers University of Technology, SE-  
13 41296 Gothenburg, Sweden

14  
15 <sup>3</sup> Department of Microbiology and Molecular Genetics, McGovern Medical School, 6431 Fannin  
16 St, Houston, Texas 77030, USA

17  
18  
19  
20 \* Corresponding author: [ronnie.berntsson@umu.se](mailto:ronnie.berntsson@umu.se), +46907865235

21  
22  
23  
24  
25

26 **Tables**

27 **Table S1.** Thermodynamic parameters of ITC experiments

28

| <b>Protein</b>                      | <b>DNA</b> | <b>K<sub>d</sub> [μM]</b> | <b>ΔS [kJ/mol/K]</b> | <b>ΔH [kJ/mol]</b> | <b>ΔG [kJ/mol]</b> | <b>n</b> |
|-------------------------------------|------------|---------------------------|----------------------|--------------------|--------------------|----------|
| PrgB <sub>188-1233</sub><br>Monomer | 19         | 364.0 ± 73.8              | 0.24 ± 0.02          | 52.71 ± 12.24      | -18.82 ± 4.73      | 1        |
| PrgB <sub>188-1233</sub><br>Dimer   | 19         | 163.6 ± 42.4              | 0.13 ± 0.03          | 17.14 ± 3.75       | -21.6 ± 5.53       | 1        |
| PrgB <sub>246-558</sub>             | 19         | 46.2 ± 14.5               | 0.14 ± 0.05          | 17.6 ± 2.93        | -24.12 ± 7.75      | 1        |
| <b>Glycerol phosphate</b>           |            | <b>K<sub>d</sub> [μM]</b> |                      |                    |                    |          |
| PrgB <sub>188-1233</sub>            |            | 309.2 ± 55.3              | 0.12 ± 0.06          | 15.27 ± 1.62       | -20.49 ± 3.58      | 8        |
| PrgB <sub>246-558</sub>             |            | 276.1 ± 71.2              | 0.10 ± 0.05          | 10.04 ± 1.83       | -19.76 ± 5.22      | 8        |

29

30

31 **Table S2.** dsDNA sequences (only 1 strand is shown).

32 **DNA<sub>10</sub>**

33 CGGCCCGGGG

34 **DNA<sub>19</sub>**

35 GGGGGCGGGGCGGGCGGCG

36 ***oriT***

37 TCGCAACATGCTAGCATGTTGCTCCGCTTGCAAAAAGAAA

38 **DNA<sub>100</sub>**

39 TCGCAACATGCTAGCATGTTGCTCCGCTTGCAAAAAGAAAGCCTACCCTTGGGTATA

40 ACCAATTGTCAAATAAGGAGACTACTTATTATGTAAAAGAAA

41 **DNA<sub>250</sub>**

42 TCGCAACATGCTAGCATGTTGCTCCGCTTGCAAAAAGAAAGCCTACCCTTGGGTATA

43 ACCAATTGTCAAATAAGGAGACTACTTATTATGTAAAAGAAAGAAGAAATAATTAT

44 GGAGAATAAACAAAACTAAAACGTCCTATTCAAAGAATAGTTAGACTATCAGAAG

45 AAGAAAATAACTTAATCAAACGAAAAATTGAGGAAAGTTTTTTTCCAACTTTCAA

46 ATTTTGCCTTGACCTTTTGATT

47 **DNA-1**

48 Biotin-

49 TGAACGAAAAATACGAGCAATTAACCAGTATTTAAATCAAGTGGCTTCGTTGAAGC

50 AAAGCATTCGAAACGCCAACAACATTGAGCTGGTCAATAGCTCTTTAAACTATTTAA  
51 AAAGCTTTACCAGCAACAACACTACAACAGCACCACCCAATCGCCCATCTTTAACGCCG  
52 TGCAAGCCGTTATCACTTCGGTATTGGGTTTTTGGAGTCTTTATGCGGG

53 **DNA-2**

54 CGTTCCTTGTTTTAGTTTGGCTTTATTCCCATTAATACTGATGATAAAATTCAAAGA  
55 TGATTTTATCGTTACAAAAATCAACGCTTCAAAGATAAATAGGTTAAAATACTCAA  
56 AATCTTTTTTTTTTTTTTGGAAATCCAATAAATTTATAGTAAAATTAGGTTTCATTGTAA  
57 ATATATTATCACTTCATGATATTCTTACAACAAAAACATTACTTTAAGGAACACTTTT  
58 ATGAAAAAG-Biotin

59

60

61

62

63 **Figures**

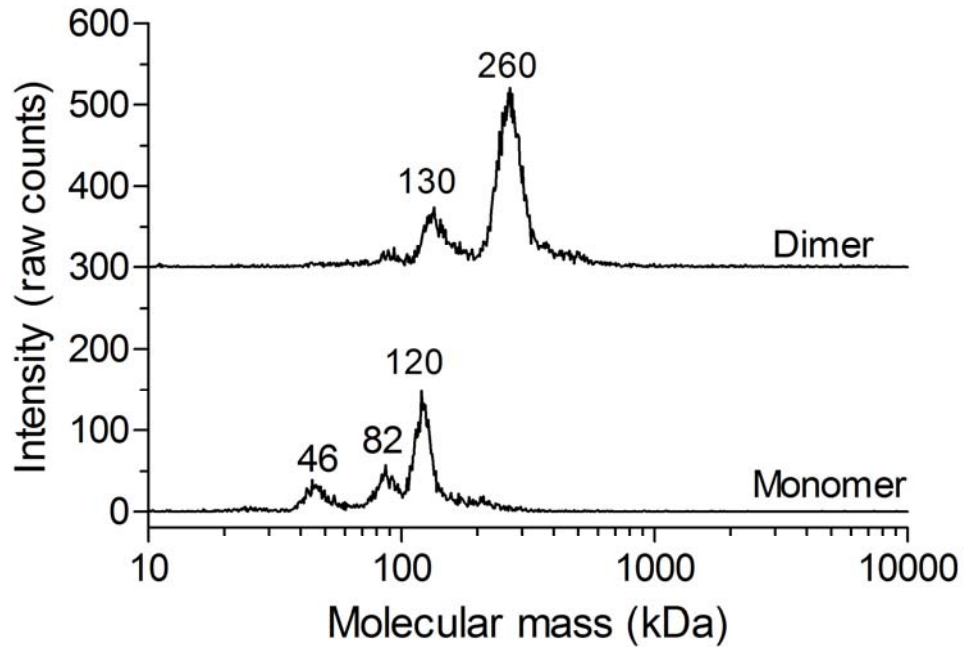

64  
65 **Figure S1** GEMMA analysis of PrgB. The two samples are taken from size exclusion  
66 chromatography fractions corresponding to dimers and monomers, respectively, and the GEMMA  
67 analysis was performed with a protein concentration of 0.05 mg/mL. The determined molecular  
68 masses (in kDa) are written above the peaks. The baseline is shifted vertically to fit two experiments  
69 in the same graph.

70  
71  
72  
73

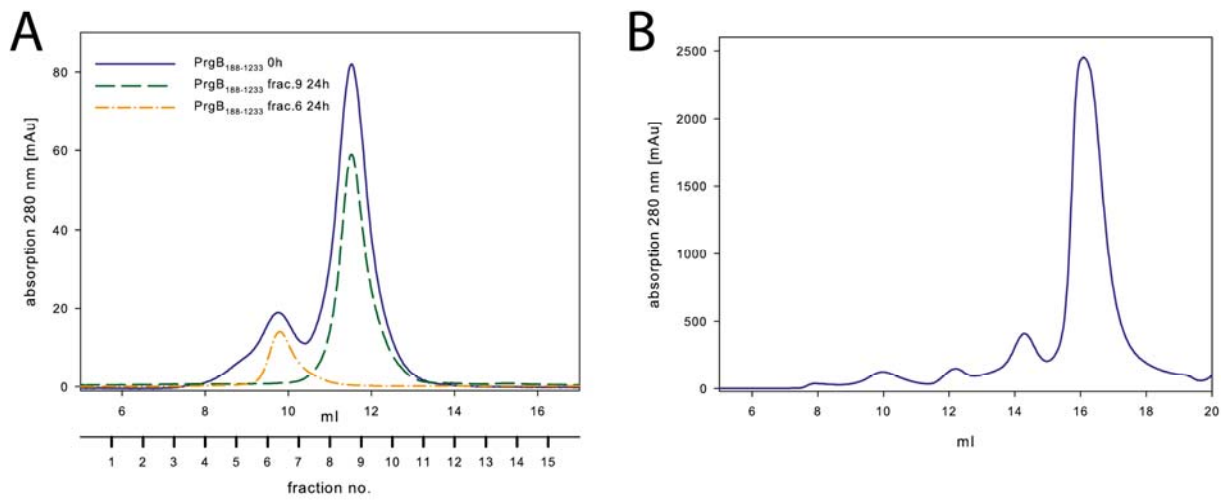

74

75 **Figure S2.** Size exclusion chromatography of PrgB on an Superdex S200 (10/300) Increase  
 76 column. The absorption at 280 nm is plotted against the elution volume. **A:** PrgB<sub>188-1233</sub> at timepoint  
 77 0 (blue solid line), the two peaks at 9.8 and 11.7 ml represent dimeric and monomeric PrgB,  
 78 respectively. Dashed yellow and green line represent fraction 6 and 9, respectively, both rerun after  
 79 24 h. **B:** Chromatogram of PrgB<sub>246-558</sub>, the elution volume of 16.2 ml corresponds to the expected  
 80 molecular weight of a monomer.

81

82

83

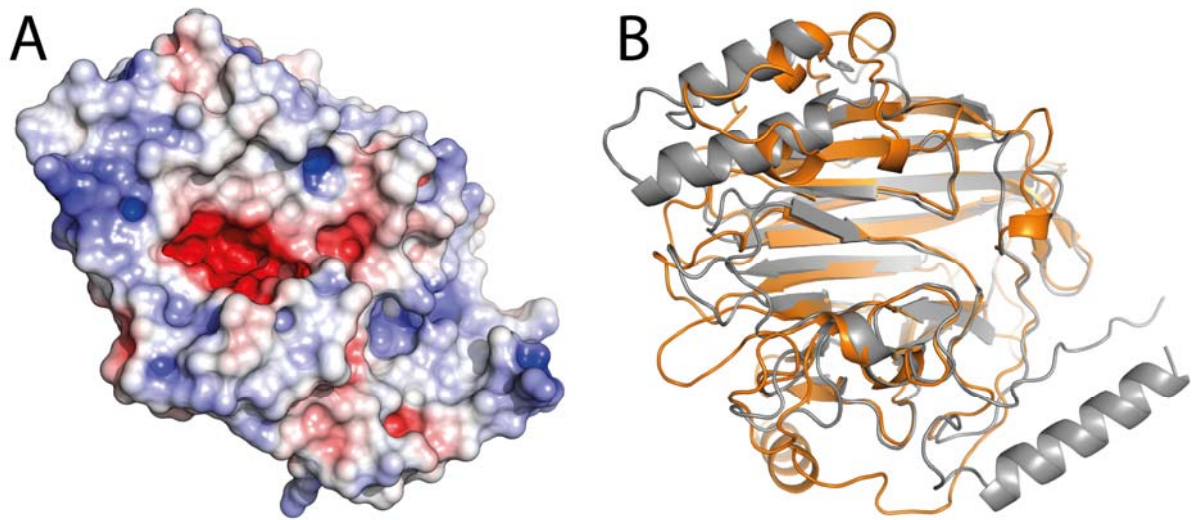

84

85 **Figure S3. A:** Surface charge distribution of SspB (PDB code 2WD6) calculated by APBS, scaled  
86 from -5 (red) to 5  $k_bT$  (blue). Compared to PrgB, the negatively charged pocket in SspB is smaller  
87 and more constricted (compare with Fig. 2b). **B:** Superposition of PrgB<sub>246-558</sub> (orange) and SspB  
88 (grey).

89

90

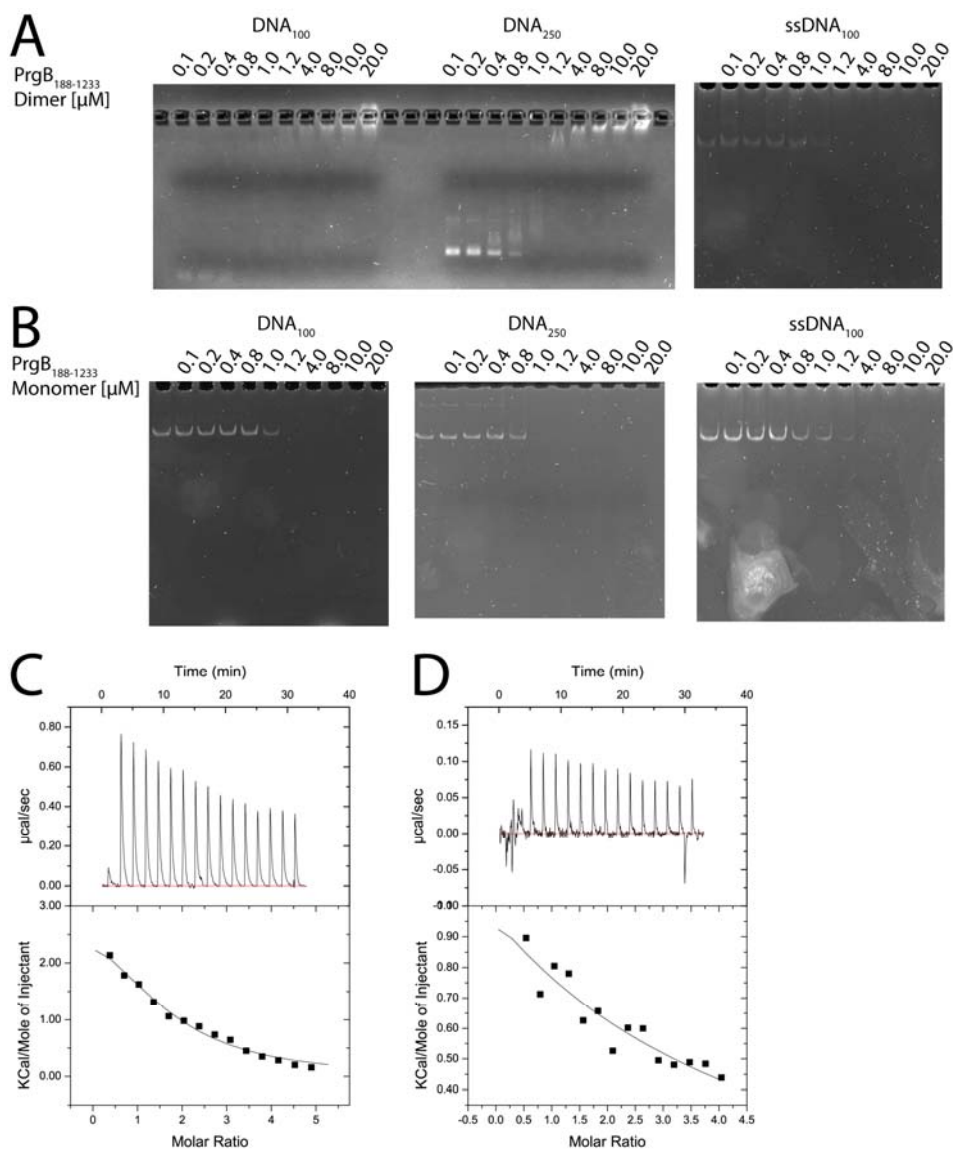

91  
 92 **Figure S4.** EMSA gels and ITC traces of DNA binding to PrgB. **A:** EMSA of PrgB<sub>188-1233</sub> dimer  
 93 with DNA<sub>100</sub> and DNA<sub>250</sub>. **B:** EMSA of PrgB<sub>188-1233</sub> monomer with DNA<sub>100</sub> and DNA<sub>250</sub> **C:** ITC  
 94 trace and curve fit of PrgB<sub>246-558</sub> binding to DNA<sub>19</sub> **D:** ITC trace and curve fit of PrgB<sub>188-1233</sub>  
 95 monomer to DNA<sub>19</sub>  
 96

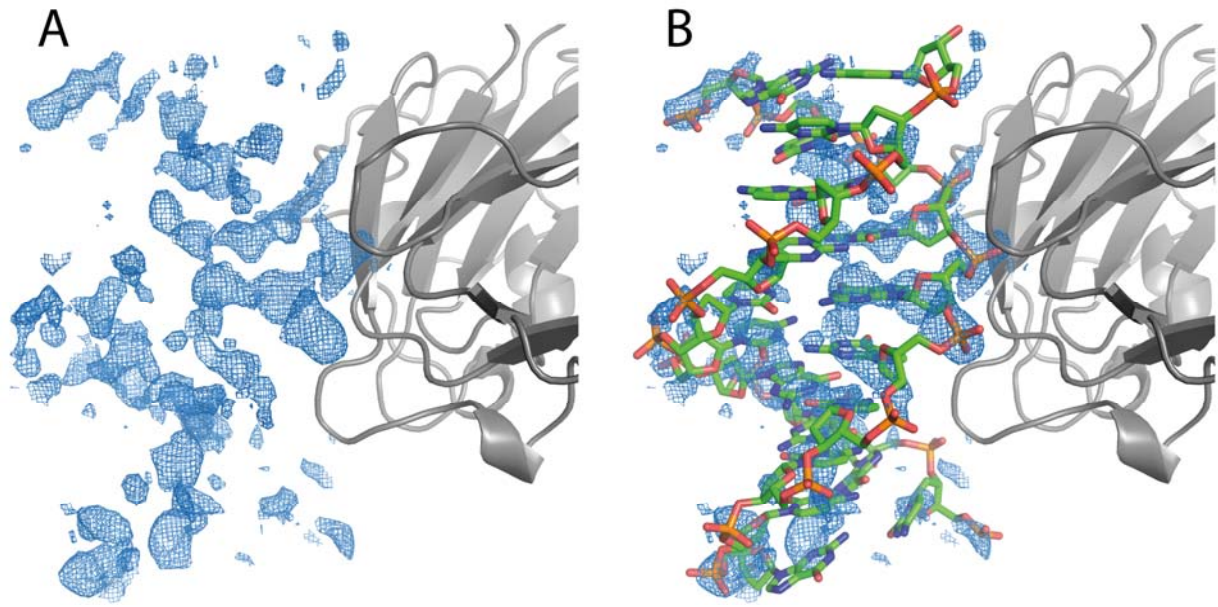

97

98

99 **Figure S5** 2mFo-DFc simulated annealing composite omit-map of the region of PrgB<sub>246-558</sub> co-

100 crystallized with a 10 bp dsDNA, where extra electron density was observed during refinement. **A:**

101 Simulated annealing composite omit-map, at  $\sigma$ -level 1.0. **B:** Model of the dsDNA molecule built

102 in the electron density.

103

104



105

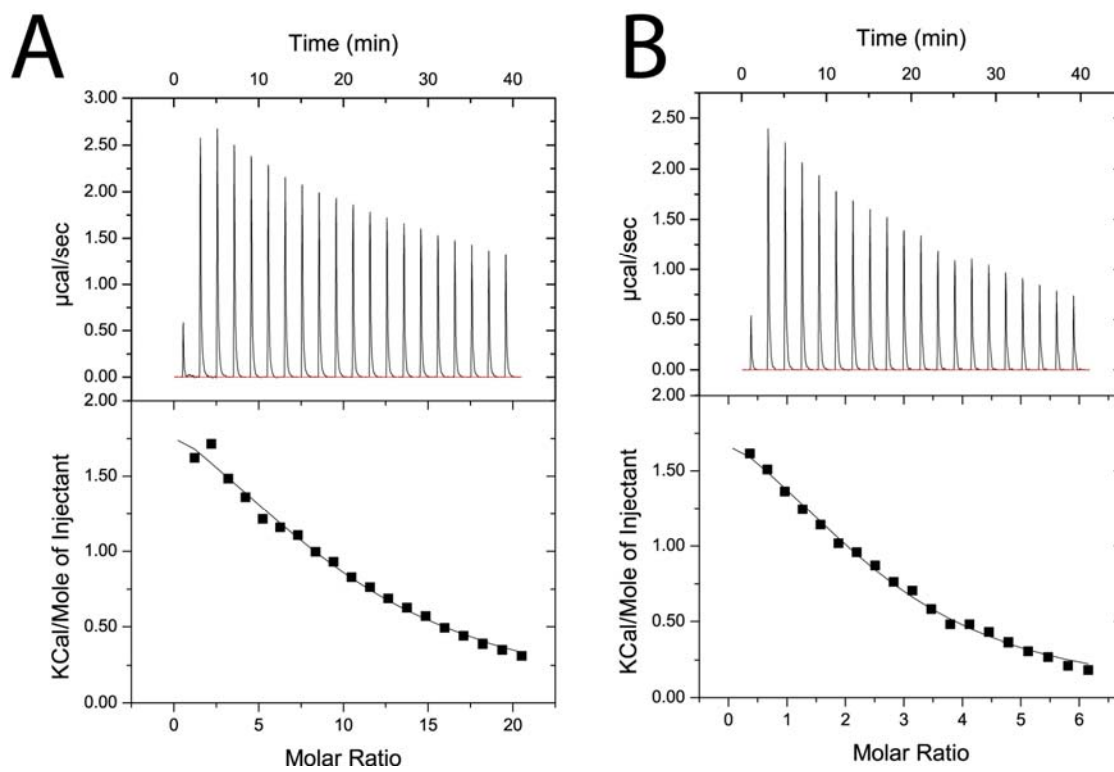

106

107

108 **Figure S6.** ITC traces and curve fits of glycerol phosphate binding to **A:** PrgB<sub>188-1233</sub> and **B:**

109 PrgB<sub>246-558</sub>

110

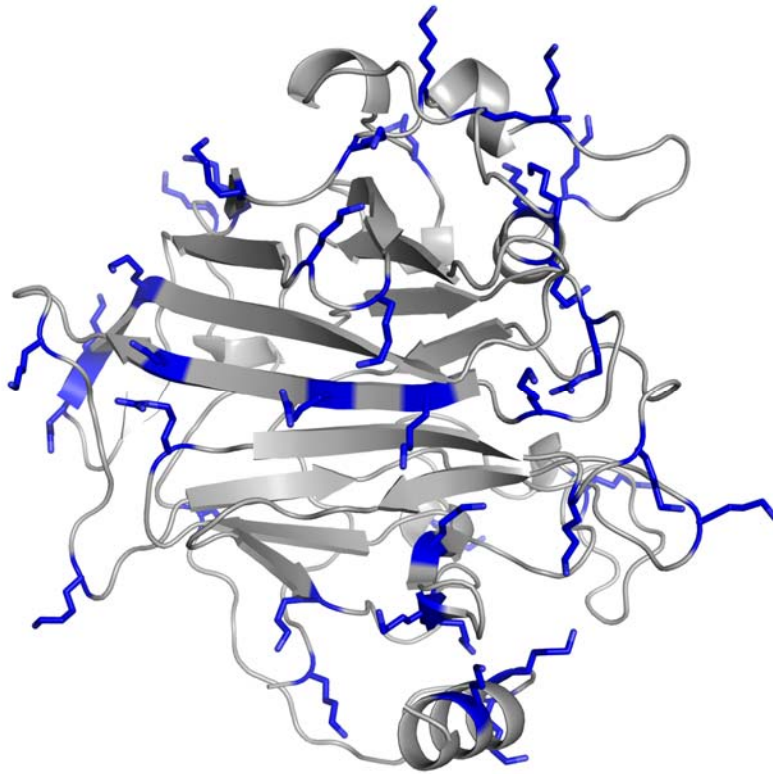

111  
112 **Figure S7.** Surface exposed arginine and lysine residues of PrgB<sub>246-558</sub>. The protein is shown in  
113 grey and all surface exposed arginines and lysines are shown as blue sticks. The orientation of the  
114 protein is the same as the back view in Fig. 2.  
115
